# Supplementary material for: Tailoring two white chromatographic platforms for simultaneous estimation of ritonavir-boosted nirmatrelvir in their novel pills: degradation, validation, and environmental impact studies
Source: Royal Society of Chemistry journal article supplement (doi:10.1039/d3ra04186g), 2023-01-01
Supplement: d3ra04186g1.pdf [file d3ra04186g1.pdf]

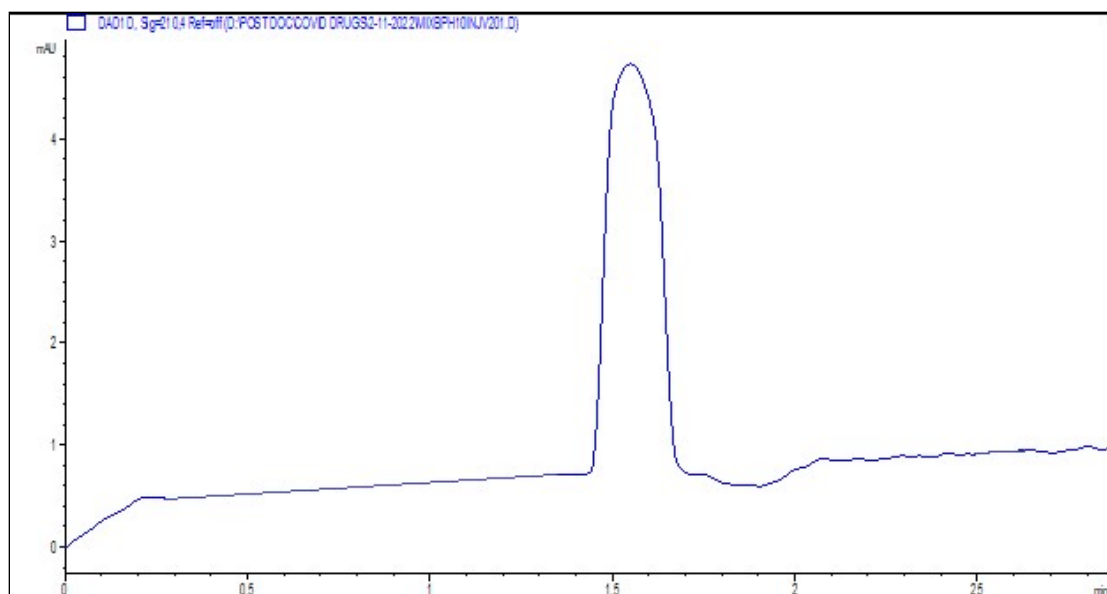

**Figure S1:** Peaks overlap of NMV and RIT using CZE and 50 mM phosphate buffer pH 7.

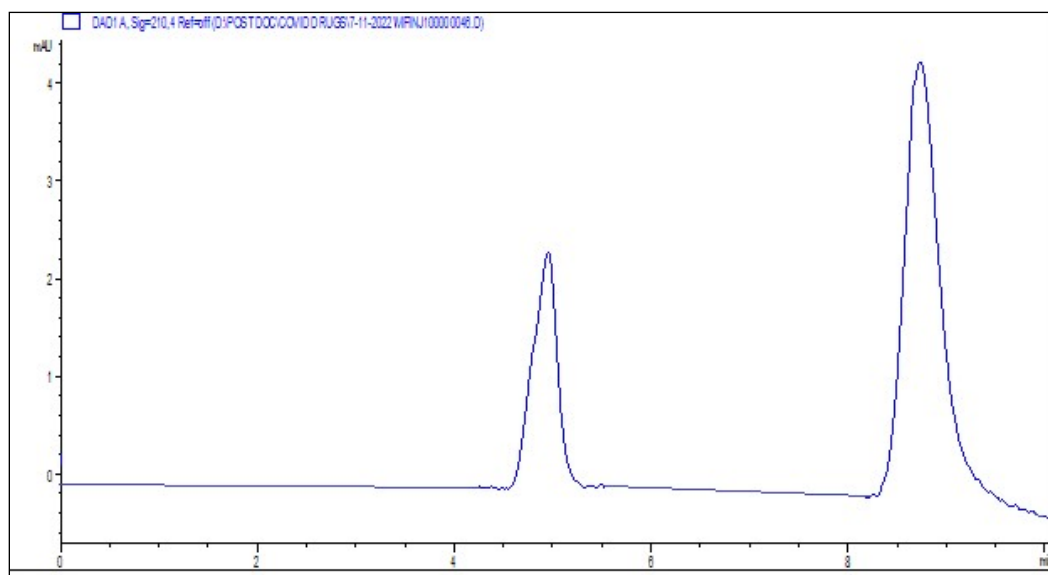

**Figure S2:** Electropherogram representing the effect of diluting solvent using 10% methanol.

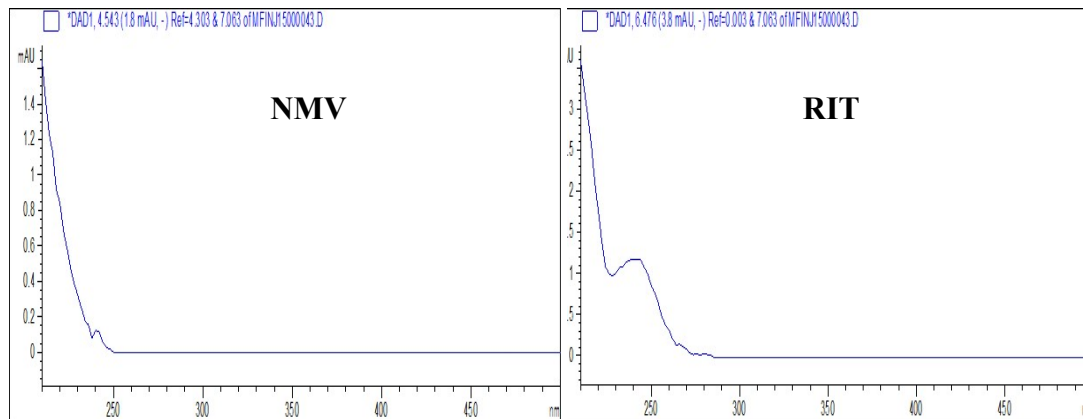

**Figure (S3):** UV spectra of NMV and RIT using the

proposed MEKC method.

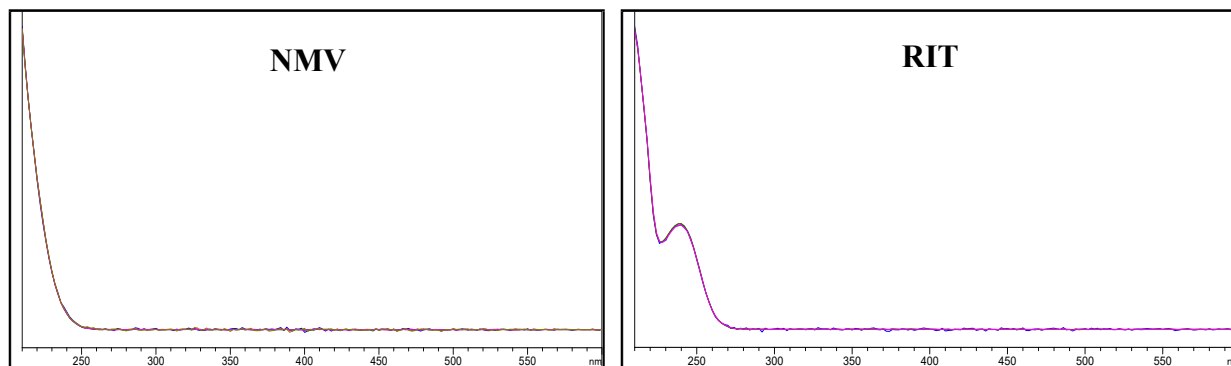

**Figure (S4):** UV spectra of NMV and RIT using the proposed HPLC method.

**NMV: MEKC**

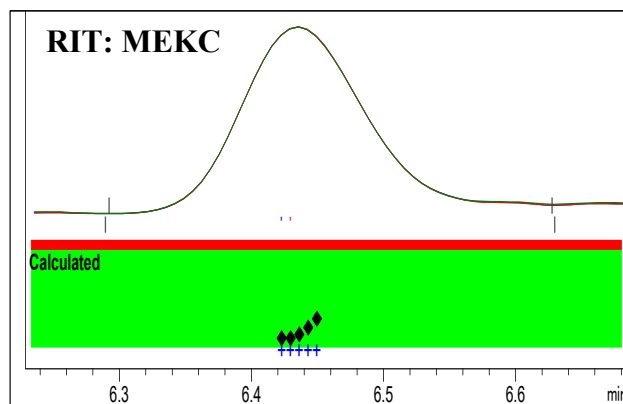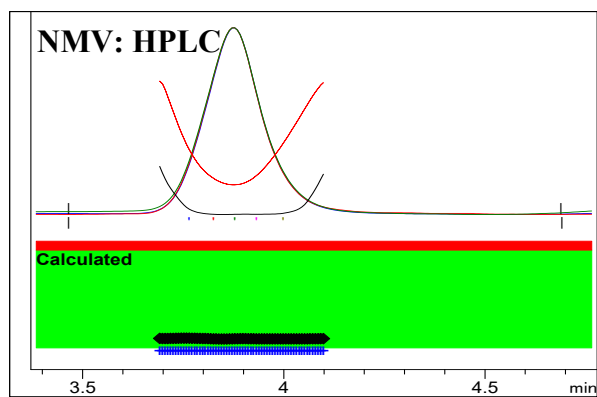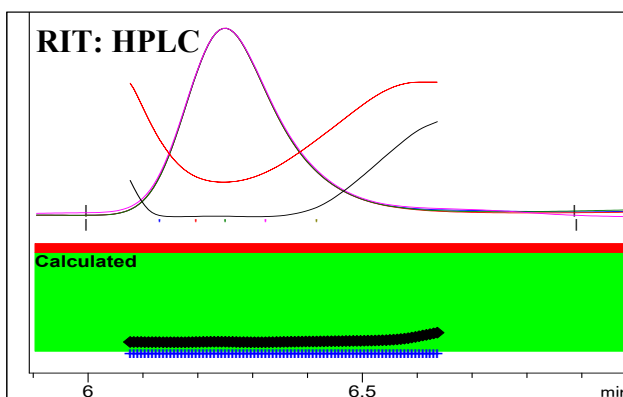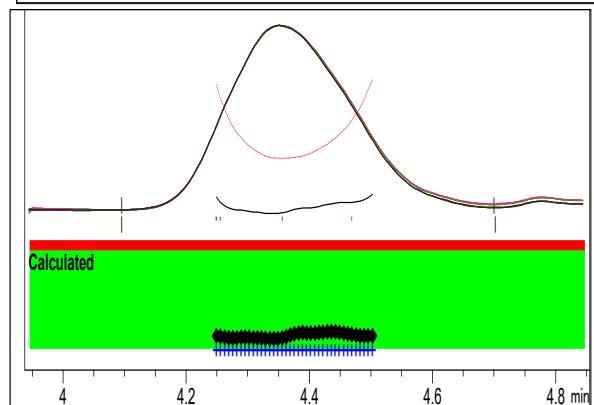

**Figure (S5):** The purity plot for NMV and RIT peaks in MEKC and HPLC methods.

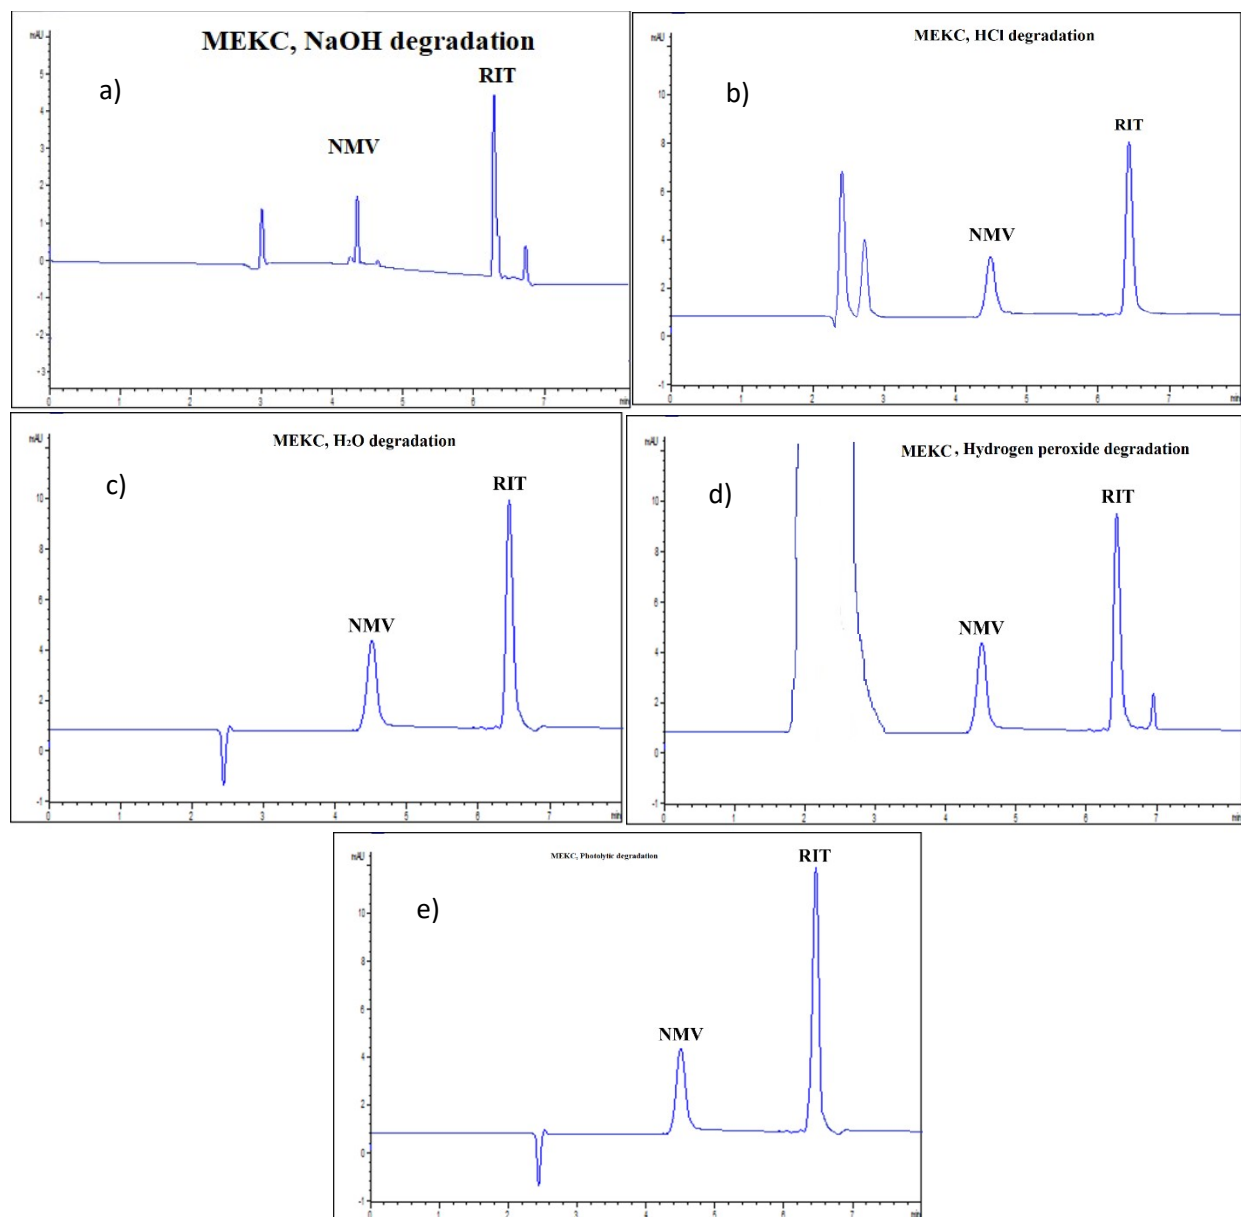

**Figure (S6).** MEKC electropherograms of 100  $\mu\text{g/mL}$  of NMV and RIT after different stress conditions: alkaline degradation (0.1 M NaOH, 70  $^{\circ}\text{C}$ ,  $\frac{1}{2}$  h), a), acidic degradation (1 M HCl, 70 $^{\circ}\text{C}$ , 1 h), b), neutral degradation (H<sub>2</sub>O, 70  $^{\circ}\text{C}$ , 1 h), c), oxidative degradation (30% H<sub>2</sub>O<sub>2</sub>, 70 $^{\circ}\text{C}$ ,  $\frac{1}{2}$  h), d), photo-degradation (day light, 4 h), e).

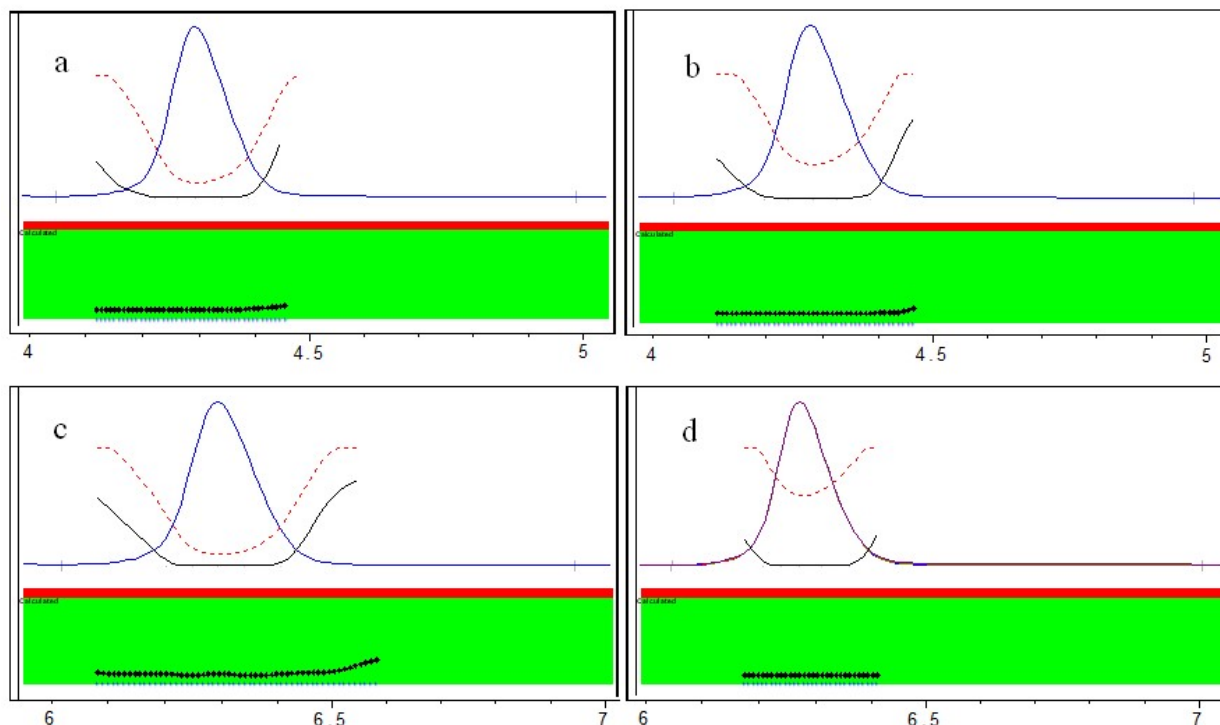

**Figure (S7):** The purity plot for NMV peaks using alkaline, a) and acidic degradation conditions, b), and RIT peaks using alkaline, c) and acidic degradation conditions, d), in MEKC method.

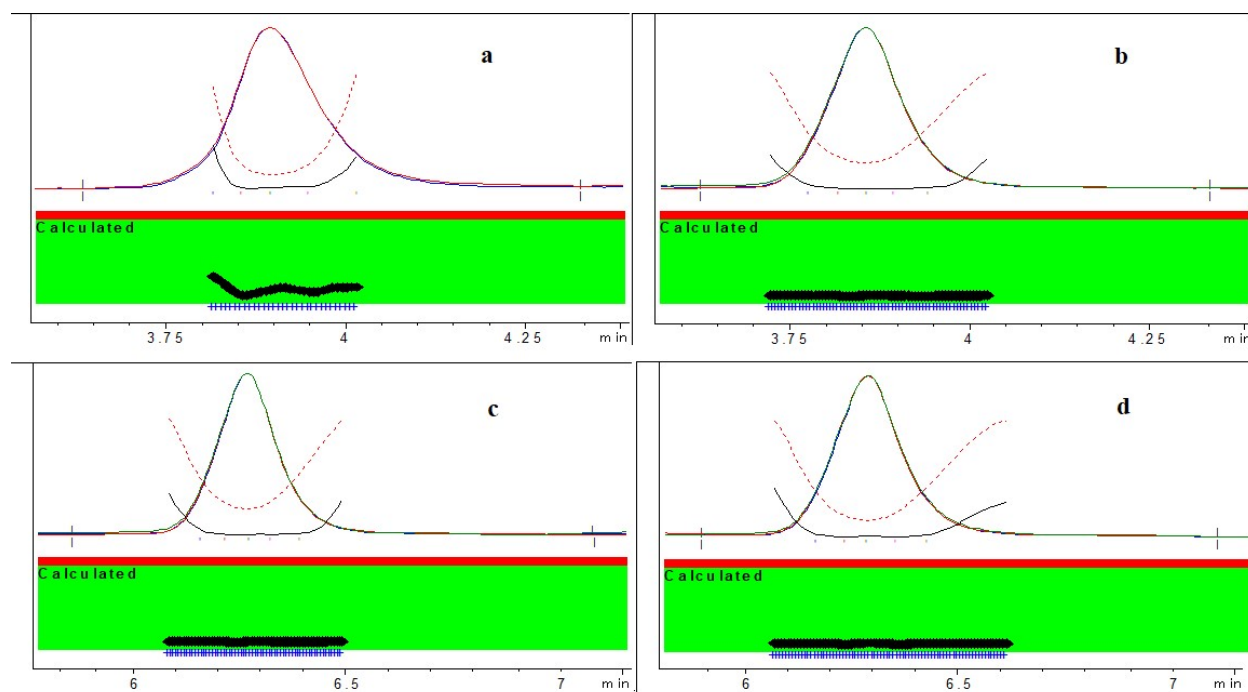

**Figure (S8):** The purity plot for NMV peaks using alkaline, a) and acidic degradation conditions, b), and RIT peaks using alkaline, c) and acidic degradation conditions, d), in HPLC method.

**Table (1S): Precision and accuracy for determination of NMV and RIT mixture using the proposed MEKC and HPLC methods.**

| Analyte | MEKC                  |                                 |                     |                                 | HPLC                  |                                 |                     |                                 |
|---------|-----------------------|---------------------------------|---------------------|---------------------------------|-----------------------|---------------------------------|---------------------|---------------------------------|
|         | Nominal value (µg/mL) | Found ± SD <sup>a</sup> (µg/mL) | RSD(%) <sup>b</sup> | E <sub>r</sub> (%) <sup>c</sup> | Nominal value (µg/mL) | Found ± SD <sup>a</sup> (µg/mL) | RSD(%) <sup>b</sup> | E <sub>r</sub> (%) <sup>c</sup> |
| NMV     | Within-day            |                                 |                     |                                 |                       |                                 |                     |                                 |
|         | 10                    | 9.93±0.14                       | 1.41                | -0.70                           | 10                    | 9.90±0.17                       | 1.72                | -0.97                           |
|         | 50                    | 50.26± 0.37                     | 0.74                | 0.52                            | 50                    | 49.99±0.33                      | 0.66                | -0.01                           |
|         | 100                   | 100.10 ±0.24                    | 0.24                | 0.10                            | 100                   | 99.98±0.40                      | 0.4                 | -0.02                           |
|         | Between-days          |                                 |                     |                                 |                       |                                 |                     |                                 |
|         | 10                    | 10.18 ± 0.14                    | 1.38                | 1.77                            | 10                    | 9.96±0.19                       | 1.86                | -0.43                           |
|         | 50                    | 50.30 ± 0.25                    | 0.50                | 0.60                            | 50                    | 49.72±0.88                      | 1.77                | -0.55                           |
|         | 100                   | 100.18 ± 0.31                   | 0.31                | 0.18                            | 100                   | 99.71±0.91                      | 0.91                | -0.29                           |
| RIT     | Within-day            |                                 |                     |                                 |                       |                                 |                     |                                 |
|         | 10                    | 10.19 ± 0.06                    | 0.59                | 1.90                            | 10                    | 10.00±0.12                      | 1.15                | 0.00                            |
|         | 50                    | 50.06 ± 0.85                    | 1.70                | 0.12                            | 50                    | 49.61±0.72                      | 1.44                | -0.77                           |
|         | 100                   | 100.32 ± 0.13                   | 0.13                | 0.32                            | 100                   | 99.48±0.80                      | 0.80                | -0.52                           |
|         | Between-days          |                                 |                     |                                 |                       |                                 |                     |                                 |
|         | 10                    | 10.16 ± 0.06                    | 0.59                | 1.60                            | 10                    | 9.93±0.18                       | 1.85                | -0.67                           |
|         | 50                    | 49.69 ± 0.56                    | 1.13                | -0.62                           | 50                    | 50.10±0.50                      | 1.00                | 0.21                            |
|         | 100                   | 100.02 ± 0.29                   | 0.29                | 0.02                            | 100                   | 99.47±0.79                      | 0.79                | -0.53                           |

**Table (2S): Robustness evaluation for the analysis of NMV and RIT mixture using the proposed MEKC and HPLC methods.**

| Parameter                                    | MEKC              |      |                        |      |                      |      |                        |      |
|----------------------------------------------|-------------------|------|------------------------|------|----------------------|------|------------------------|------|
|                                              | NMV               |      |                        |      | RIT                  |      |                        |      |
|                                              | Peak area<br>± SD | RSD% | Migration time<br>± SD | RSD% | Peak<br>area ±<br>SD | RSD% | Migration<br>time ± SD | RSD% |
| <b>Buffer<br/>concentration</b><br>50 ± 2 mM | 40.55 ±<br>0.13   | 0.32 | 4.51 ± 0.08            | 1.77 | 89.93 ±<br>0.38      | 0.42 | 6.30 ± 0.10            | 1.58 |
| <b>Buffer pH</b><br>9.2 ± 0.2 pH unit        | 40.91 ±<br>0.33   | 0.8  | 4.54 ± 0.05            | 1.10 | 90.07 ±<br>0.90      | 1.00 | 6.34 ± 0.12            | 1.89 |
| <b>SDS<br/>concentration</b><br>25 ± 2 mM    | 40.66 ±<br>0.10   | 0.25 | 4.47 ± 0.06            | 1.34 | 89.8 ±<br>0.26       | 0.29 | 6.27 ± 0.01            | 0.16 |
| <b>Wavelength</b><br>210 ± 2 nm              | 40.63±<br>0.08    | 0.20 |                        |      | 90.2<br>±0.10        | 0.11 |                        |      |
| Parameter                                    | HPLC              |      |                        |      |                      |      |                        |      |
|                                              | NMV               |      |                        |      | RIT                  |      |                        |      |
|                                              | Peak area<br>± SD | RSD% | Retention time<br>± SD | RSD% | Peak<br>area ±<br>SD | RSD% | Retention<br>time ± SD | RSD% |
| <b>Buffer<br/>concentration</b><br>50 ± 2 mM | 2312±0.41         | 0.02 | 3.89 ± 0.06            | 0.15 | 4827<br>±0.56        | 0.01 | 6.29 ±0.23             | 0.35 |
| <b>Buffer pH</b><br>5 ± 0.2 pH unit          | 2330±0.59         | 0.03 | 3.90 ± 0.10            | 0.03 | 4878<br>±0.94        | 0.02 | 6.25 ±0.04             | 0.06 |
| <b>Flow rate</b><br>1 ± 0.05 mL              | 2299±0.18         | 0.01 | 3.89 ± 0.08            | 0.20 | 4799<br>±1.12        | 0.02 | 6.31 ±0.41             | 0.61 |
| <b>Wavelength</b><br>210 ± 2 nm              | 2305±0.33         | 0.01 |                        |      | 4853<br>±1.07        | 0.02 |                        |      |

\* Robustness parameters were determined for a mixture containing 100 µg/mL of NMV and RIT for MEKC and HPLC.

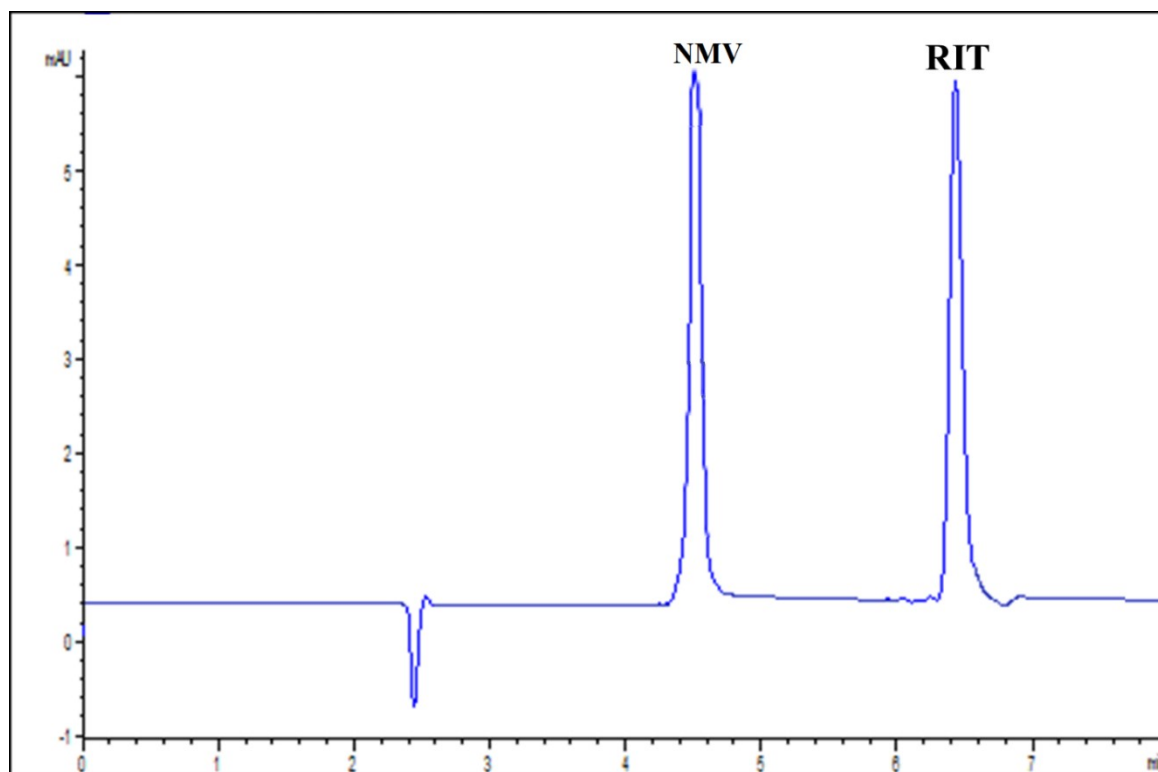

**Figure S9:** MEKC electropherogram of NMV and RIT extracted from the tablets at concentration 150 and 50  $\mu\text{g/mL}$ , respectively.

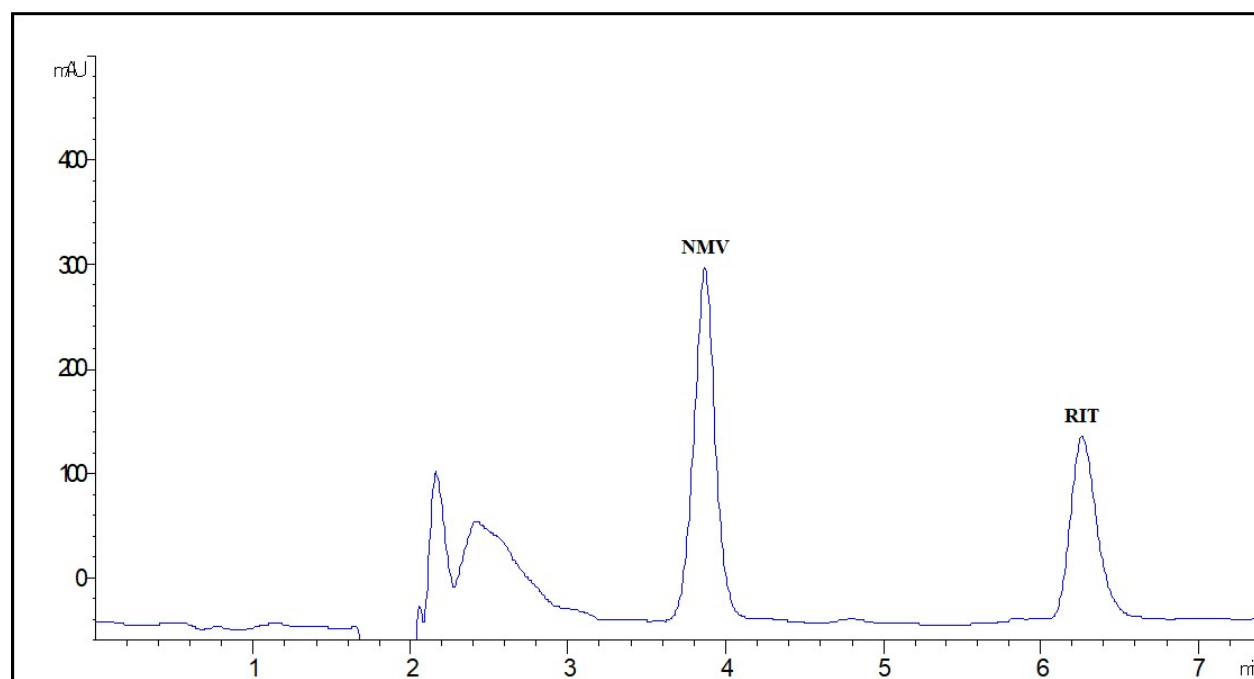

**Figure S10:** HPLC chromatogram of NMV and RIT extracted from the tablets at concentration 150 and 50  $\mu\text{g/mL}$ , respectively.
